# Supplementary material for: Reachy, a 3D-Printed Human-Like Robotic Arm as a Testbed for Human-Robot Control Strategies
Source: PubMed Central journal article supplement (PMC6703080; doi:10.3389/fnbot.2019.00065), 2019-08-14
Supplement: Data_Sheet_1.pdf [file Data_Sheet_1.pdf]

## Supplementary Material

### 1 PYTHON CODE SAMPLE

This appendix presents a code sample demonstrating the compactness of basic commands and options to control Reachy.

---

```
1 from reachy import Reachy
2 robot = Reachy() # Connect to the robot
3 robot.compliant = False # Stiffen its motors
4
5 # 90° degree elbow flexion in 2 seconds
6 robot.elbow_pitch.goto_position(-90, 2)
7
8 # Retrieve some data from embedded sensors
9 angle = robot.elbow_pitch.present_position
10 temp = robot.elbow_pitch.present_temperature
11
12 bounds = {}
13 for m in robot.motors:
14     # Set max angular speed allowed
15     m.moving_speed = 300
16     # Store angular bounds by motor name
17     bounds[m.name] = (m.lower_limit,
18                       m.upper_limit)
19
20 # Adjust settings selectively on the three first motors (shoulder)
21 for m in robot.motors[:3]:
22     m.pid = (3, 1, 1) # PID gains
23     m.torque_limit = 75 # Max load allowed
```

---

### 2 VIDEO CLIPS

#### 2.1 Tele-operation

Link: <https://www.youtube.com/watch?v=Oa9mHMoDtYI>

Description: Demonstration of the tele-operation setup, using the V120 Trio motion tracker and IKPy

#### 2.2 Vision-driven control

Link: <https://www.youtube.com/watch?v=qloR67AaqQ4>

Description: Demonstration of the vision-driven control setup, using the GP3 HD eye tracker, the Myo armband and a set of small objects
